# Supplementary material for: Discovery of a potent and highly fluorescent sirtuin inhibitor
Source: Royal Society of Chemistry journal article supplement (doi:10.1039/c5md00307e), 2015-01-01
Supplement: c5md00307e1.pdf [file c5md00307e1.pdf]

## Discovery of a potent and highly fluorescent sirtuin inhibitor

Yeong Keng Yoon<sup>a\*</sup>, Mohamed Ashraf Ali<sup>a</sup>, Ang Chee Wei<sup>a</sup>, Tan Soo Choon<sup>a</sup>, Amir Nasrolahi Shirazi<sup>b</sup>, Keykavous Parang<sup>b</sup>

## Supporting information

### Table of contents

- (i) Characterization data for the synthesized compounds.
- (ii) **Fig. S1.** Plots of product formation versus time in the absence and presence of 10  $\mu$ M of **BZD9L1**.
- (iii) **Fig. S2.** Plot of absorbance (346 nm) versus concentration of **BZD9L1** in DMSO.
- (iv) **Fig. S3.** Quantum yield ( $\Phi$ ) determination of **BZD9L1**.
- (v) **Fig. S4.** Molecular docking comparison between **BZD9L1** and compound **4d,e**.
- (vi) **Table S1.** Cell viability after 72h treatment of synthesized compounds **4a-h** against HCT-116, MDA-MB-468 and CCRF-CEM cells.
- (vii) **Supplementary NMR data**
- (viii) **Supplementary MS data**

## Characterization data for synthesized compounds

### **Ethyl 2-phenyl-1H-benzo[d]imidazole-5-carboxylate (4a):**

Obtained as beige solid. Yield: 80%; m.p. 177-178 °C. <sup>1</sup>H NMR (500 MHz, CDCl<sub>3</sub>): δ 1.44 (3H, t, *J* = 7.1 Hz), 4.44 (2H, q, *J* = 7.1 Hz), 7.50-7.60 (3H, m), 7.64 (1H, s), 7.95 (1H, dd, *J* = 1.5 Hz, 9 Hz), 8.10 (2H, dd, *J* = 9 Hz), 8.30 (1H, s). <sup>13</sup>C NMR (125 MHz, CDCl<sub>3</sub>): 14.70, 62.12, 128.07, 130.28, 130.49, 131.96, 140.27, 143.22, 152.00, 168.54. ESI-MS: *m/z* 267.2 [M+H]<sup>+</sup>. Anal. Calc for C<sub>16</sub>H<sub>14</sub>N<sub>2</sub>O<sub>2</sub>: C, 72.16%; H, 5.30%; N, 10.52%. Found : C, 72.20%; H, 5.25%; N, 10.50%.

### **Ethyl 2-p-tolyl-1H-benzo[d]imidazole-5-carboxylate (4b):**

Obtained as red-brown solid. Yield: 87%; m.p. 181-182 °C. <sup>1</sup>H NMR (500 MHz, CDCl<sub>3</sub>): δ 1.43 (3H, t, *J* = 7.1 Hz), 2.35 (3H, s), 4.41 (2H, q, *J* = 7.1 Hz), 6.95 (2H, d, *J* = 9 Hz), 7.55 (1H, d, *J* = 9 Hz), 7.69 (1H, dd, *J* = 1.5 Hz, 9 Hz), 7.74 (2H, d, *J* = 9 Hz), 8.21 (1H, s). <sup>13</sup>C NMR (125 MHz, CDCl<sub>3</sub>): 14.58, 25.63, 61.59, 115.73, 118.46, 123.99, 125.12, 130.92, 131.62, 149.25, 153.86, 168.90. ESI-MS: *m/z* 281.1 [M+H]<sup>+</sup>. Anal. Calc for C<sub>17</sub>H<sub>16</sub>N<sub>2</sub>O<sub>2</sub>: C, 72.84%; H, 5.75%; N, 9.99%. Found : C, 72.67%; H, 5.72%; N, 9.90%.

### **Ethyl 2-(4-tert-butylphenyl)-1H-benzo[d]imidazole-5-carboxylate (4c):**

Obtained as brown solid. Yield: 85%; m.p. 200-201 °C. <sup>1</sup>H NMR (500 MHz, CDCl<sub>3</sub>): δ 1.31 (9H, s), 1.42 (3H, t, *J* = 7.1 Hz), 4.39 (2H, q, *J* = 7.1 Hz), 6.90 (2H, d, *J* = 9 Hz), 7.55 (1H, d, *J* = 9 Hz), 7.68 (1H, dd, *J* = 1.5 Hz, 9 Hz), 7.74 (2H, d, *J* = 9 Hz), 8.22 (1H, s). <sup>13</sup>C NMR (125 MHz, CDCl<sub>3</sub>): 14.72, 31.90, 34.75, 62.11, 114.73, 119.05, 124.80, 125.33, 129.24, 130.05, 149.22, 153.73, 168.88. ESI-MS: *m/z* 323.1 [M+H]<sup>+</sup>. Anal. Calc for C<sub>20</sub>H<sub>22</sub>N<sub>2</sub>O<sub>2</sub>: C, 74.51%; H, 6.88%; N, 8.69%. Found : C, 74.37%; H, 6.62%; N, 8.98%.

### **Ethyl 2-(4-hydroxyphenyl)-1H-benzo[d]imidazole-5-carboxylate (4d):**

Obtained as white solid. Yield: 92%; m.p. 209-210 °C. <sup>1</sup>H NMR (300 MHz, CDCl<sub>3</sub>): δ 1.45 (3H, t, *J* = 7.2 Hz), 4.43 (2H, q, *J* = 7.2 Hz), 6.88 (1H, d, *J* = 8.4 Hz), 7.49 (2H, d, *J* = 8.4 Hz), 7.59 (2H, d, *J* = 8.4 Hz), 8.08 (1H, dd, *J* = 1.5 Hz, 8.4 Hz), 8.56 (1H, s). <sup>13</sup>C NMR (75 MHz, CDCl<sub>3</sub>): 14.69, 61.56, 105.68, 107.77, 109.20, 111.10, 122.95, 125.60, 153.29, 157.46, 168.58. ESI-MS: *m/z* 283.1 [M+H]<sup>+</sup>. Anal. Calc for C<sub>16</sub>H<sub>14</sub>N<sub>2</sub>O<sub>3</sub>: C, 68.11%; H, 5.00%; N, 9.91%. Found : C, 68.12%; H, 5.02%; N, 9.88%.

### **Ethyl 2-(4-methoxyphenyl)-1H-benzo[d]imidazole-5-carboxylate (4e):**

Obtained as beige crystal. Yield: 90%; m.p. 188-189 °C. <sup>1</sup>H NMR (300 MHz, CDCl<sub>3</sub>): δ 1.43 (3H, t, *J* = 6.9 Hz), 3.88 (3H, s), 4.53 (2H, t, *J* = 6.9 Hz), 7.06 (2H, d, *J* = 9 Hz), 7.47 (1H, d, *J* = 9 Hz), 7.75 (2H, d, *J* = 9 Hz), 8.04 (1H, dd, *J* = 1.5 Hz, 9 Hz), 8.54 (1H, s). <sup>13</sup>C NMR (75 MHz, CDCl<sub>3</sub>): 14.69, 56.22, 61.45, 109.75, 109.98, 121.12, 122.18, 123.40, 150.05, 151.59, 168.67. ESI-MS: *m/z* 297.1 [M+H]<sup>+</sup>. Anal. Calc for C<sub>17</sub>H<sub>16</sub>N<sub>2</sub>O<sub>3</sub>: C, 68.88%; H, 5.50%; N, 4.47%. Found : C, 68.90%; H, 5.41%; N, 4.50%.

**Ethyl 2-(4-(dimethylamino)phenyl)-1H-benzo[d]imidazole-5-carboxylate (4f):**

Obtained as brown solid. Yield: 84%; m.p. 220-221 °C. <sup>1</sup>H NMR (500 MHz, CDCl<sub>3</sub>): δ 1.42 (3H, t, *J* = 7.1 Hz), 3.05 (3H, s), 4.38 (2H, q, *J* = 7.1 Hz), 6.86 (2H, d, *J* = 9 Hz), 7.55 (1H, d, *J* = 9 Hz), 7.70 (1H, dd, *J* = 1.5 Hz, 9 Hz), 7.73 (2H, d, *J* = 9 Hz), 8.20 (1H, s). <sup>13</sup>C NMR (125 MHz, CDCl<sub>3</sub>): 14.72, 40.30, 62.07, 113.06, 117.27, 124.80, 125.33, 129.24, 129.82, 148.02, 153.69, 168.86. ESI-MS: *m/z* 310.1 [M+H]<sup>+</sup>. Anal. Calc for C<sub>18</sub>H<sub>19</sub>N<sub>3</sub>O<sub>2</sub>: C, 69.95%; H, 6.17%; N, 13.59%. Found: C, 69.90%; H, 6.21%; N, 13.62%.

**Ethyl 2-(4-(piperidin-1-yl)phenyl)-1H-benzo[d]imidazole-5-carboxylate (4g/BZD9L1):**

Obtained as brown solid. Yield 83%; m.p. 190-191 °C. <sup>1</sup>H NMR (500 MHz, CDCl<sub>3</sub>): δ = 1.38 (3H, t, *J* = 7.0 Hz), 1.67 (6H, t, *J* = 6.5 Hz), 3.16 (4H, t, *J* = 6.5 Hz), 4.43 (2H, q, *J* = 7.0 Hz), 6.72 (2H, d, *J* = 8.5 Hz), 7.54 (1H, d, *J* = 8.5 Hz), 7.88 (1H, dd, *J* = 1.5 Hz, 8.5 Hz), 7.95 (2H, d, *J* = 8.5 Hz), 8.23 (1H, s). <sup>13</sup>C NMR: 14.35, 24.19, 25.30, 48.58, 61.02, 114.30, 114.41, 115.91, 124.52, 125.00, 128.48, 135.60, 153.18, 153.89, 166.96. ESI-MS: *m/z* 350.2 [M+H]<sup>+</sup>. Anal. Calc. for C<sub>21</sub>H<sub>23</sub>N<sub>3</sub>O<sub>2</sub>: C, 72.18%; H, 6.63%; N, 12.03%. Found: C, 72.15; H, 6.61; N, 12.04%.

**Ethyl 2-(4-morpholinophenyl)-1H-benzo[d]imidazole-5-carboxylate (4h):**

Obtained as orange-brown solid. Yield 73%; m.p. 204-205 °C. <sup>1</sup>H NMR (500 MHz, CDCl<sub>3</sub>): δ = 1.44 (3H, t, *J* = 7.0 Hz), 3.22 (4H, t, *J* = 5.0), 3.85 (4H, t, *J* = 5.0 Hz), 4.43 (2H, q, *J* = 7.0 Hz), 6.80 (2H, d, *J* = 8.5 Hz), 7.47 (1H, d, *J* = 8.5 Hz), 7.90 (1H, dd, *J* = 1.5 Hz, 8.5 Hz), 7.98 (1H, d, 2H, d, *J* = 8.5 Hz), 8.27 (1H, s). <sup>13</sup>C NMR: 14.34, 47.97, 60.90, 66.67, 112.08, 114.54, 116.01, 124.70, 123.65, 127.48, 135.76, 151.22, 153.88, 167.95. ESI-MS: *m/z* 352.2 [M+H]<sup>+</sup>. Anal. Calc. for C<sub>20</sub>H<sub>21</sub>N<sub>3</sub>O<sub>3</sub>: C, 68.36%; H, 6.02%; N, 11.96%. Found: C, 68.31; H, 6.07; N, 11.93%.

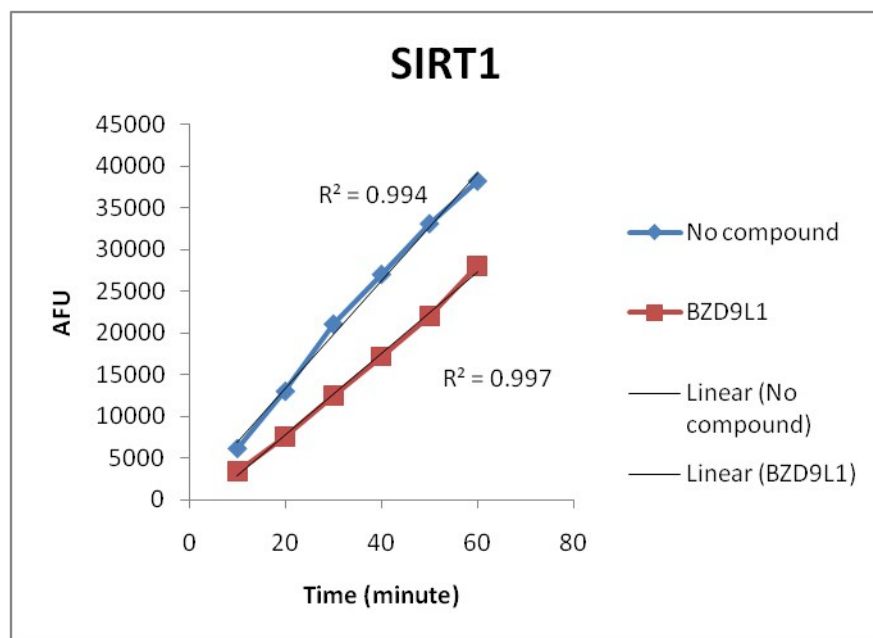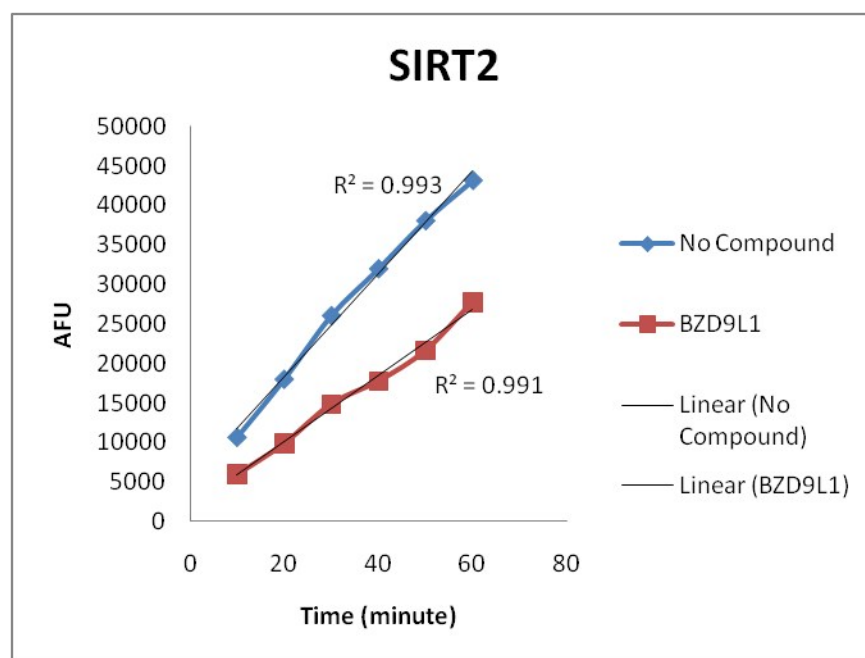

**Fig. S1.** Plots of product formation versus time in the absence and presence of 10  $\mu$ M of **BZD9L1**.

AFU stands for arbitrary fluorescence unit.

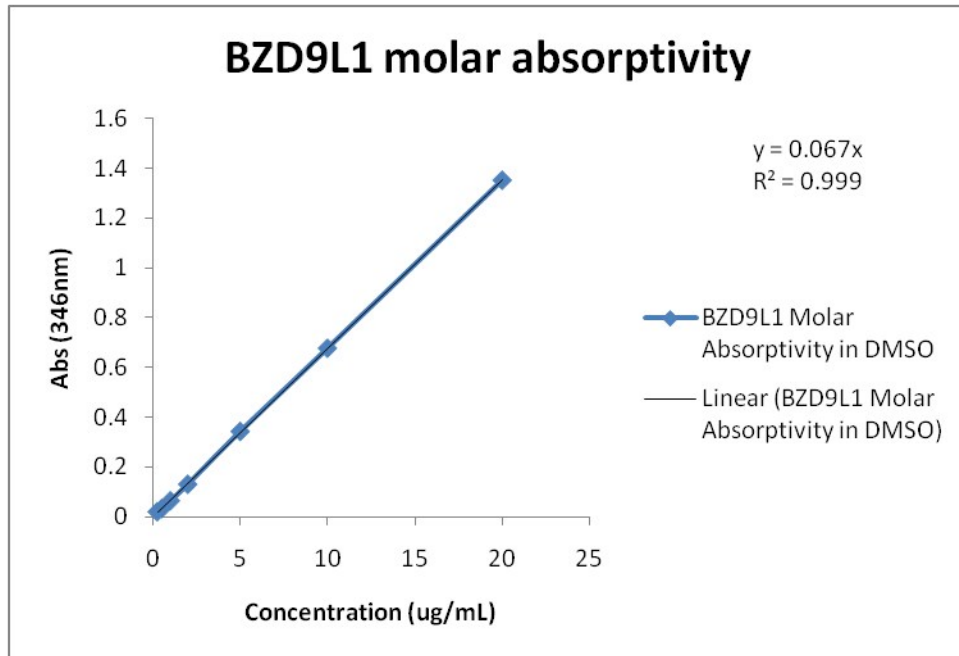

**Fig. S2.** Plot of absorbance (346 nm) versus concentration of **BZD9L1** in DMSO. Molar absorptivity (molar extinction coefficient,  $\epsilon$ ) was determined by the gradient of the slope using Beer Lambert equation. Absorbance readings were taken in a quartz cuvette (10 mm path length), using Agilent 8453 UV-visible spectrophotometer. The excitation wavelength was set at 346 nm.

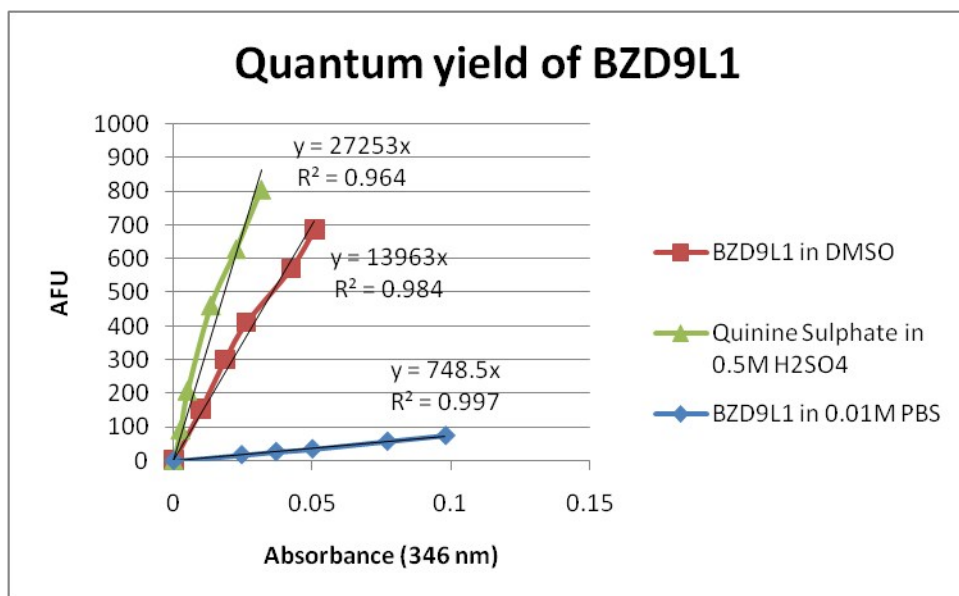

**Fig. S3.** Quantum yield ( $\Phi$ ) determination of **BZD9L1**. Quinine sulphate was used as reference. AFU stands for arbitrary fluorescence unit.

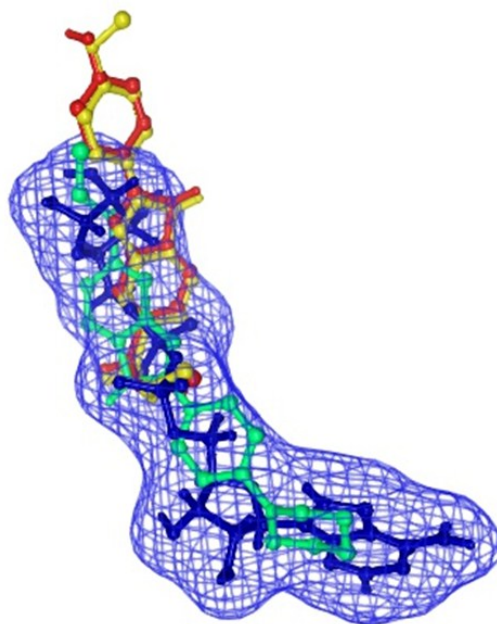

**Fig. S4.** **BZD9L1** (green), **4d** (red) and **4e** (yellow) were docked into the active site of SIRT2 (PDB code: 3ZGV). It showed that **BZD9L1** were optimally fitted into the ADPr binding site (blue) while the phenolic substituent (**4d**) and the anisole substituent (**4e**) were shifted out from the ADPr binding site. This resulted in less favourable complexes and weaker inhibitory SIRT2 activities for **4d** and **4e**.

|                  | CCRF-CEM           |          | HCT116             |          | MDA-MB-468         |          |
|------------------|--------------------|----------|--------------------|----------|--------------------|----------|
|                  | Cell Viability (%) | S.D. (%) | Cell Viability (%) | S.D. (%) | Cell Viability (%) | S.D. (%) |
| <b>DMSO</b>      | 100.00             | 5.54     | 100.00             | 6.01     | 100.00             | 8.06     |
| <b>4a</b>        | 58.29              | 2.24     | 29.69              | 9.44     | 49.27              | 6.83     |
| <b>4b</b>        | 61.24              | 5.44     | 48.40              | 12.80    | 89.08              | 0.75     |
| <b>4c</b>        | 82.16              | 8.59     | 54.19              | 4.36     | 54.62              | 8.32     |
| <b>4d</b>        | 85.49              | 5.37     | 77.07              | 3.59     | 76.48              | 12.39    |
| <b>4e</b>        | 87.37              | 4.66     | 75.60              | 2.10     | 82.76              | 2.24     |
| <b>4f</b>        | 49.45              | 3.41     | 29.74              | 1.41     | 31.10              | 0.79     |
| <b>4g/BZD9L1</b> | 36.26              | 0.34     | 15.90              | 2.04     | 33.98              | 0.49     |
| <b>4h</b>        | 37.81              | 11.33    | 54.48              | 3.93     | 42.58              | 4.89     |

**Table S1.** Cell viability after 72h treatment of synthesized compounds **4a-h** against HCT-116, MDA-MB-468 and CCRF-CEM cells.



## Supplementary NMR data

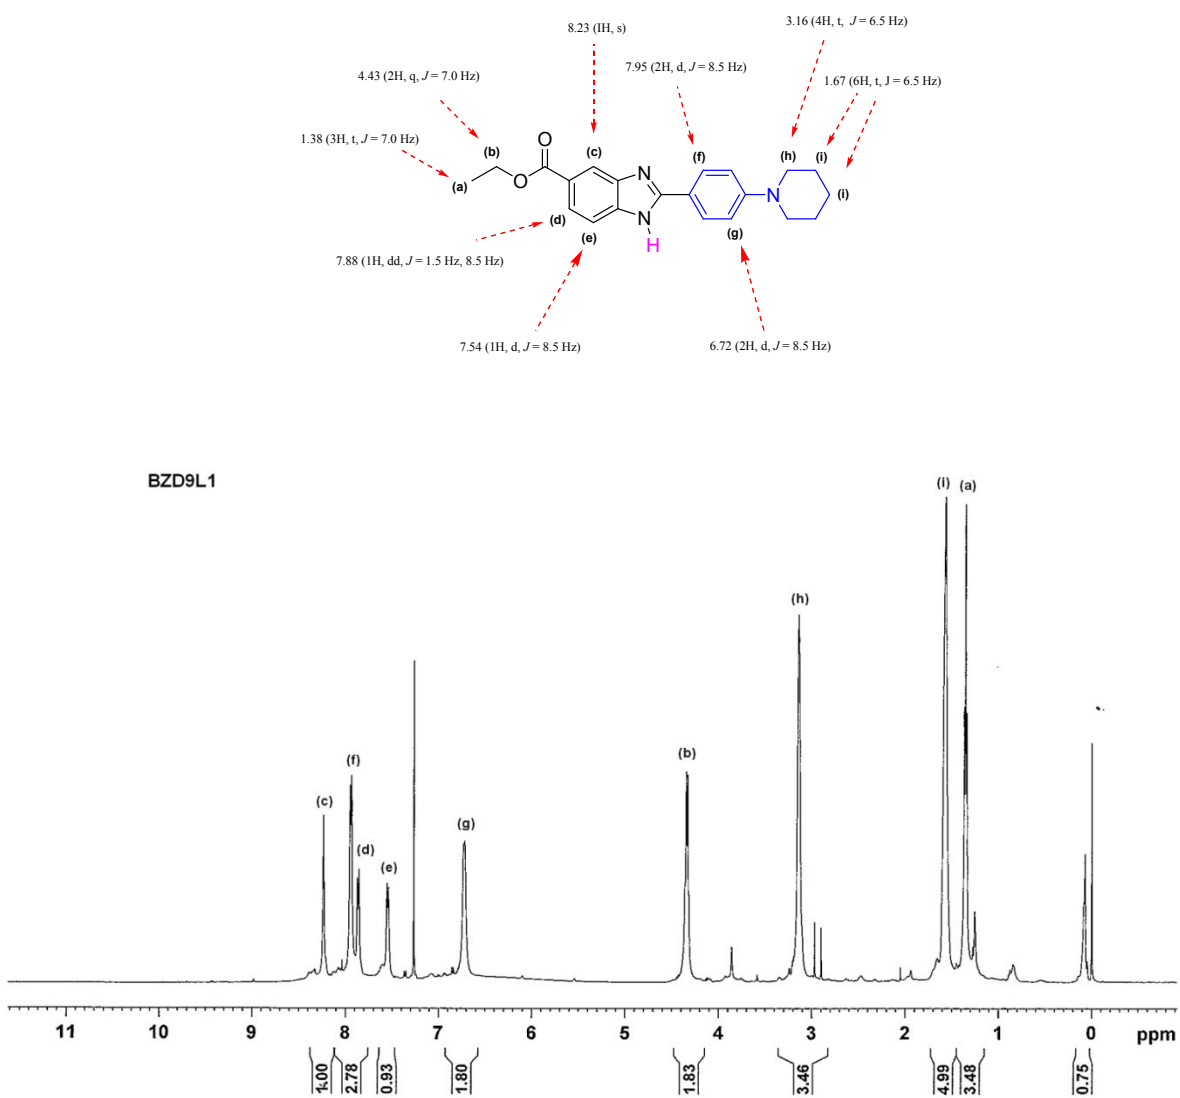

Fig. S5. <sup>1</sup>H NMR of BZD9L1

BZD9L1

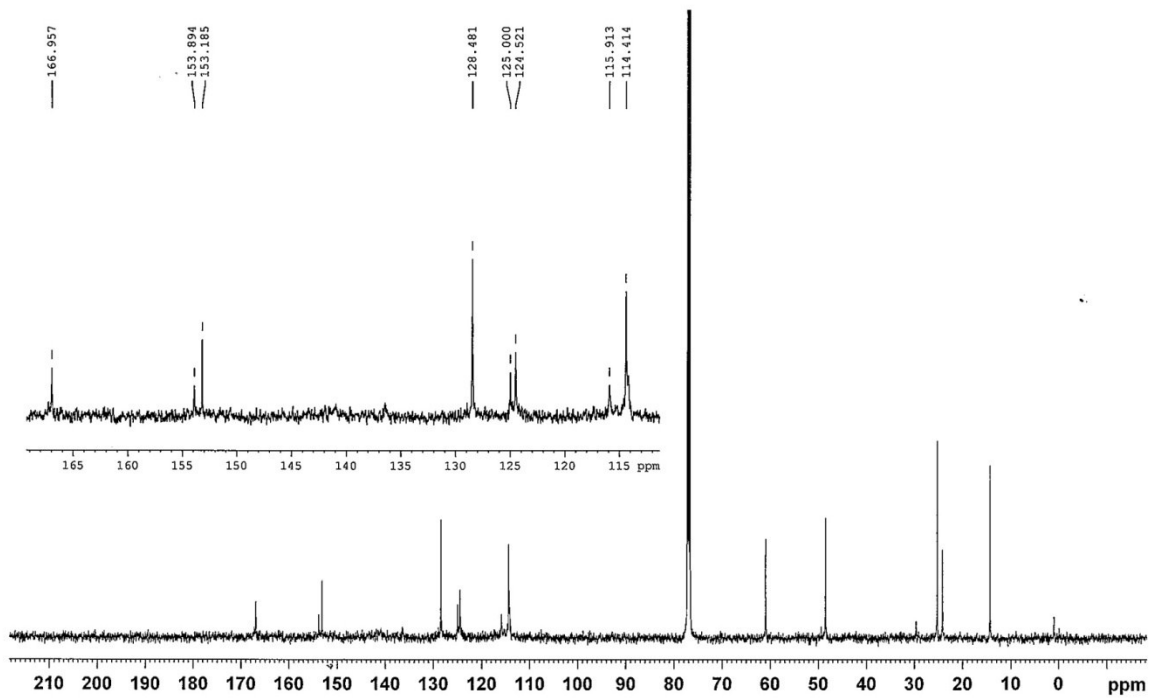

Fig. S6.  $^{13}\text{C}$  NMR of BZD9L1

BZD9L1

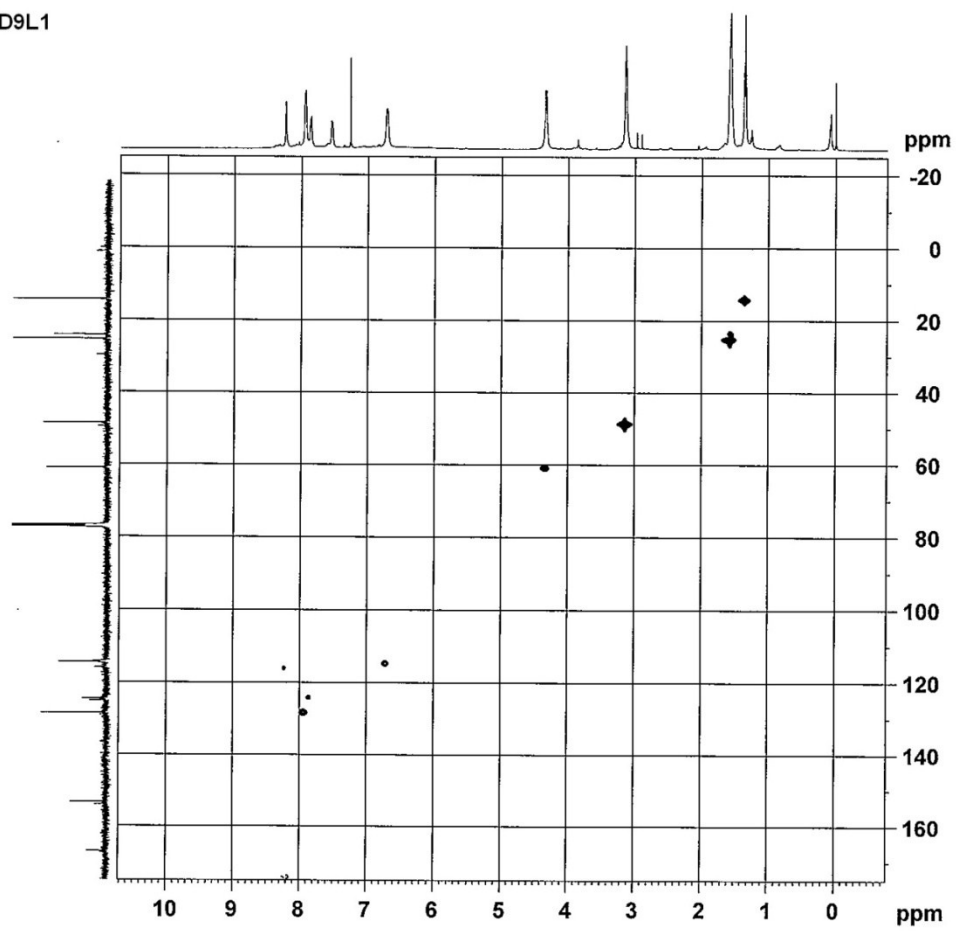

Fig. S7. 2D HMQC for BZD9L1.

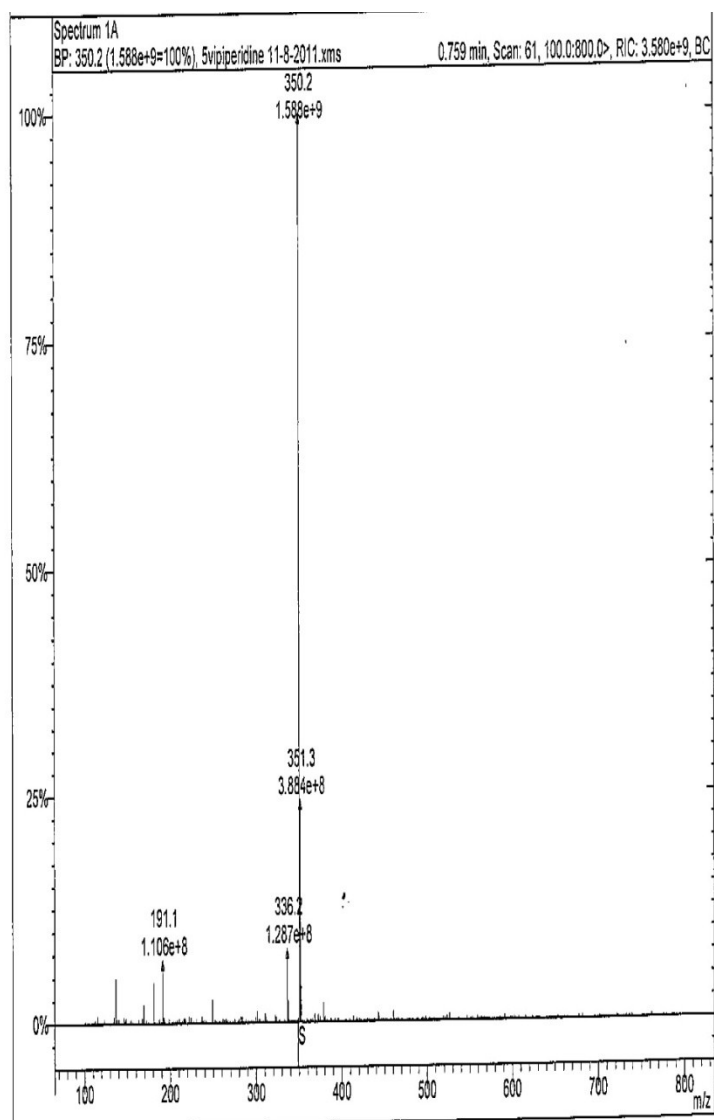

Fig. S8. Direct infusion MS data for **BZD9L1**.
